# Supplementary material
Source: Springer Nature journal article supplement (https://www.springermedizin.de/resource/supplementary/12916_2010_362_MOESM1_ESM.pdf/9599796)
Supplement: MOESM1 [file 9599796]

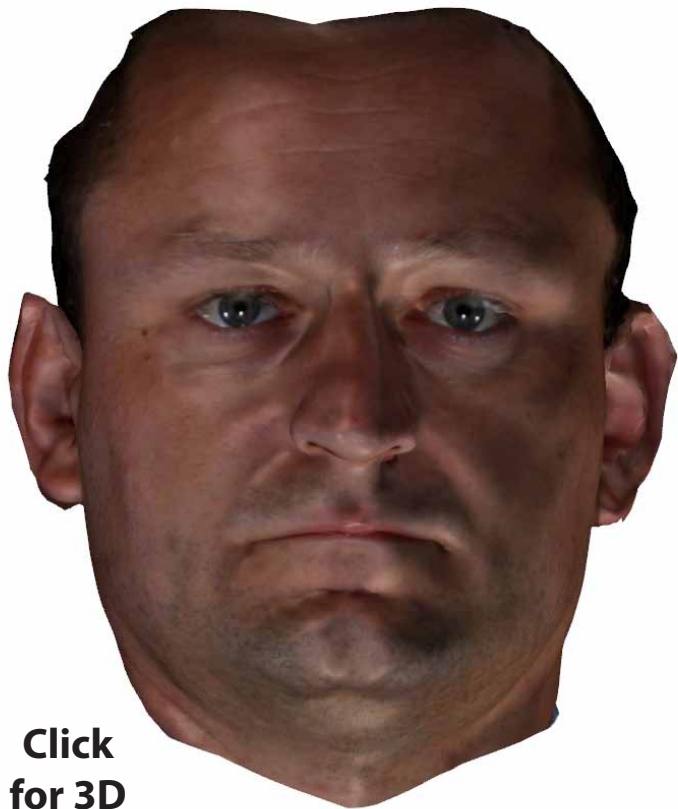

**Click  
for 3D**
